# Supplementary material
Source: PubMed Central journal article supplement (PMC3290441)
Supplement: supp_fj.11-191510_11-191510SuppData.pdf [file supp_fj.11-191510_11-191510SuppData.pdf]

**Supplemental Table 1.** Distances between matching  $\alpha$ -carbons in a model of a rat M3R dimer characterized by a TM5-TM5 interface. The M3R dimer model was generated as described under Materials and Methods and corresponds to the energetically most favorable M3R dimer compatible with experimental BRET data (14). C $\alpha$  numbers refer to amino acid positions in the rat M3R sequence.

| C $\alpha$ -C $\alpha$ | Distance (Å) |
|------------------------|--------------|
| 252-252                | 15.83        |
| 253-253                | 19.53        |
| 254-254                | 14.73        |
| 255-255                | 9.47         |
| 256-256                | 15.13        |
| 257-257                | 16.70        |
| 258-258                | 10.45        |
| 259-259                | 8.50         |
| 260-260                | 13.30        |
| 261-261                | 13.17        |

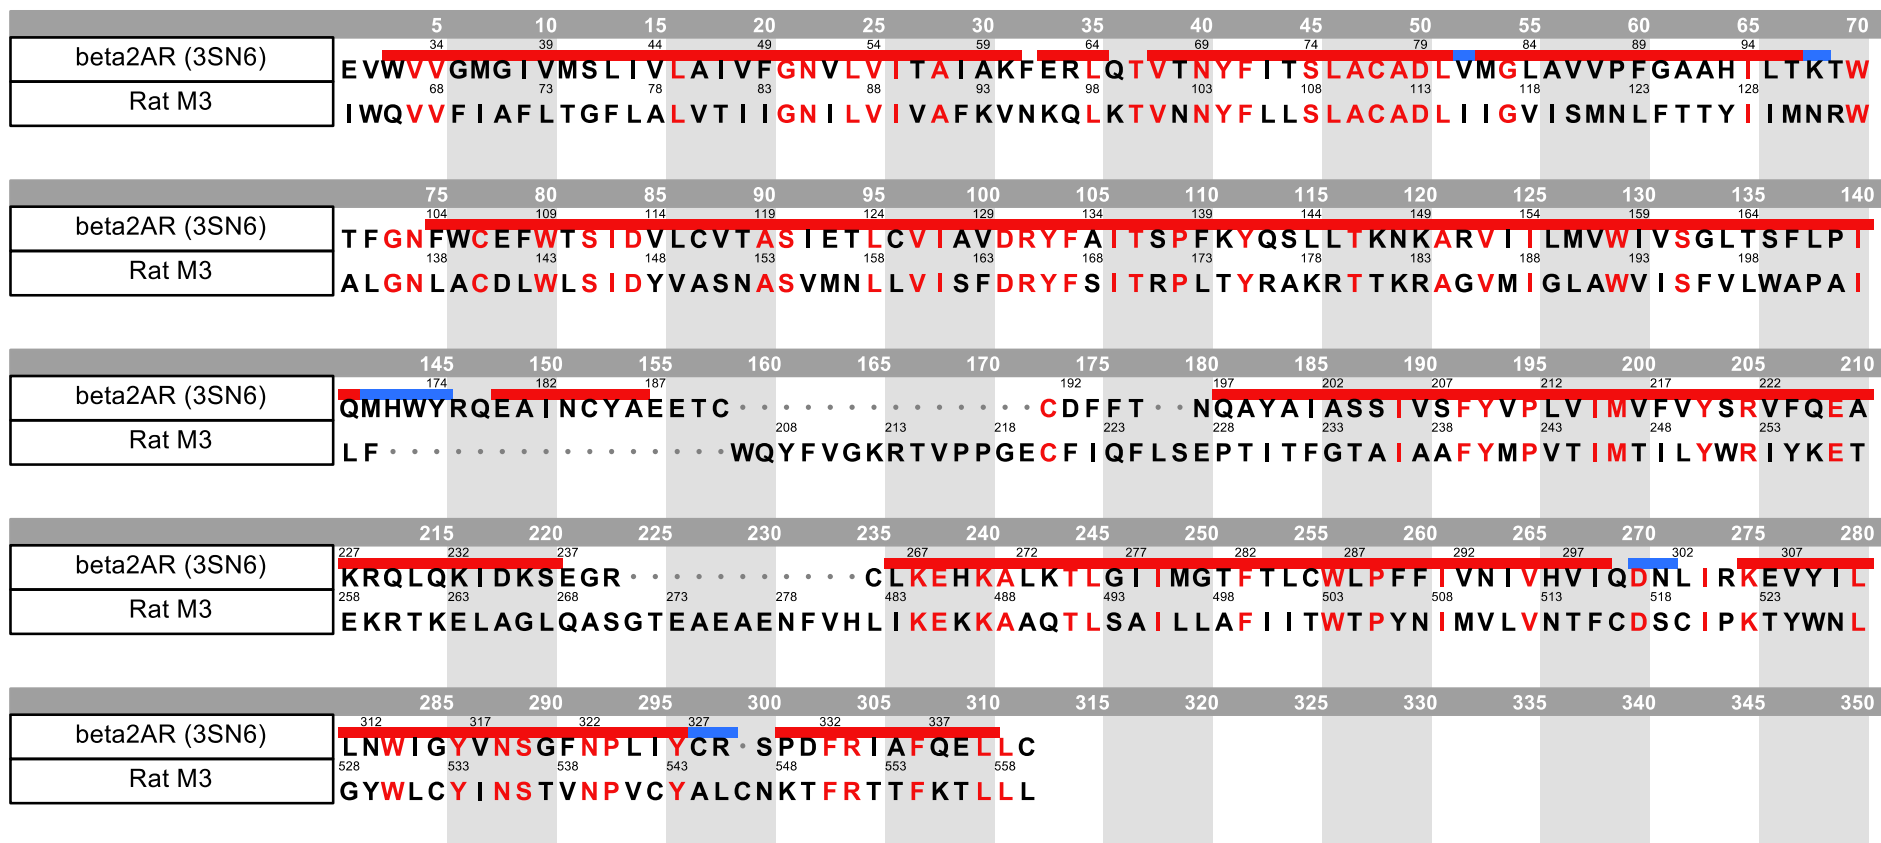

**Supplemental Figure 1.** Alignment of the sequences of the human  $\beta_2$ -adrenergic receptor ( $\beta_2$ -AR; PDB ID: 3SN6; ref. 17) and the rat M<sub>3</sub> muscarinic receptor (M<sub>3</sub>R). The residues that are conserved among the two receptors are highlighted in red. The bars above the sequences indicate the secondary structure found in the crystal structure of the  $\beta_2$ AR (red,  $\alpha$ -helix; blue, 1-4 turn). Figure generated with MOE (31).
